# Supplementary material
Source: PubMed Central journal article supplement (PMC3557069)
Supplement: 1206761110_pnas.201206761SI.pdf [file 1206761110_pnas.201206761SI.pdf]

# Supporting Information

Maute et al. 10.1073/pnas.12067611110

## SI Materials and Methods

**Plasmids and shRNA.** Expression vectors for transient transfection of tRNA were generated by PCR amplification of Gly(GCC) chr1. tRNA68 (chr1:161493501–161493953), Gly(GCC) chr17.tRNA5 (chr17:8028941–8029251), and a CU1276 predicted genomic precursor (chr19:35115779–35116077) followed by insertion into the multiple cloning site of pcDNA3 expression vector (Invitrogen). CU1276 hairpin-expressing vector was generated by restriction digestion of pcDNA3 vector containing the human miR-26a-1 locus (chr3:38010684–38011069) with NaeI and BtgI to remove the miR-26a-1 hairpin; annealed oligos with sequences 5'-CGTG-GCCTCGTCGATTCCCGGCCAATGCACCAAGTGCAGGT-CCCAATGTGGT GCATTGTCTGGGAATTCACGGGGAC-GCGGGCCTGGACGCC-3' and 5'-GGCGTCCAGGCCCGC-GTCCCCGTGAATTCCCAGACAATGCACCACATTGGGA CCTGCACTTGGTGCATTGGCCGGGAATCGACGAGGCC-3' were ligated in its place. An inducible CU1276 hairpin-expressing vector was created by restriction digest of the pcDNA3-CU1276\_hairpin vector and subsequent subcloning into the SfiI sites of pRTS1-GLSVP vector (1). Self-ligated pRTS1-GLSVP vector containing no insert was used as an empty vector control. shRNA-expressing plasmids pLKO.1-puro-shCtrl, pLKO.1-puro-shDICER-58, pLKO.1-puro-shDICER-61, and pLKO.1-puro-shDICER-62 were purchased from Open Biosystems. pIR-ESneo-HA-FLAG-AGO1, -AGO2, -AGO3, -AGO4, and -EGFP were obtained from Addgene (2). The RPA1, WHSC1L1, and STAG2 3'UTR reporter constructs were generated by PCR amplification of human genomic DNA, followed by insertion into the multiple cloning site of the pmiRGLO vector (Promega). RPA1 3'UTR-MUT reporter was generated by site-directed mutagenesis with primers 5'-CAAATAGGCATAATTTCTATATTT-CCTCCACCTCCG-3' and 5'-GGAAATATAGGAAATTA-TGCCTATTTGAAACTTCTGC-3'; STAG2 3'UTRMUT reporter was generated by site-directed mutagenesis with primers 5'-GCTGTTAGTTGGCTTTTTCTATATTATTTTCATGCTT-3' and 5'-GAAATAATATAGGAAAAAGCCAATAACAGCGC-ATAAATAAAATA-3'.

**qRT-PCR Conditions.** RNA samples were reverse-transcribed with the SuperScript II First Strand Synthesis Kit (Invitrogen) in the presence of 0.2  $\mu$ M RTFS primer (5'-TGTCAGGCAACCG-

TATTCACCGTGAGTGGTTGGTGCATTG-3'), random hexamers, or Oligo d(T) primer according to the manufacturer's indications. One-tenth of the cDNA volume was used as a template for PCR amplification in the presence of 70 nM SS primer (5'-CGTCAGATGTCCGAGTAGAGGGGGAACGGCGTCCG-ATCCCCGGC-3'), and 70 nM each of MPF (5'-TGTCAGGC-AACCGTATTCACC-3') and MPR (5'-CGTCAGATGTCCG-AGTAGAGG-3') universal primers, or gene specific primers, as appropriate. The 5s rRNA and RNU66 were detected from cDNA generated by random hexamer reverse transcription, according to gene-specific primers (5srRNAF: 5'-GCCCCGAT-CTCGTCTGATCT-3', 5srRNAR: 5'-AGCCTACAGCACCC-GGTATT-3', RNU66F: 5'-GGTGATGGAAATGTGTGTTAGCC-3', RNU66R: 5'-AGGATAGAAAGAACCACCTCA-3'). RPA1, RPA2, and GAPDH were detected from cDNA generated by Oligo d(T) reverse transcription, according to gene-specific primers (RPA1F: 5'-CTTCACGTCCATCACAGTGG-3', RPA1R: 5'-TTTCCAGAATGCCAACTTCC-3', RPA2F: 5'-AGGGAGA-GCACCTATCAGCA-3', RPA2R: 5'-TTCAACCCTTCAGGT-CTTGG-3', GAPDHF: 5'-CTGACTTCAACAGCGACACC-3', GAPDHR: 5'-CCCTGTTGCTGTAGCCAAAT-3').

**Western Blot Conditions and Antibody Information.** All primary antibody dilutions were prepared in PBS with 0.1% Tween 20 and 5% (mass/mass) BSA. Dilutions and incubation conditions were as follows: ACTB (A5441; Sigma), 1:5,000, 1 h at room temperature; DICER (13D6; Abcam), 1:1,000, overnight at 4 °C; GFP (JL-8; Clontech), 1:5,000, 30 min at room temperature;  $\gamma$ H2AFX (05-636; Millipore), 1:1,000, overnight 4 °C; H2AFX, total (A300-082A; Bethyl Laboratories), 1:500, overnight at 4 °C; RPA1 (2267; Cell Signaling), 1:1,000, overnight at 4 °C; RPA2 (14692; Santa Cruz), 1:500, overnight at 4 °C. HRP-conjugated secondary antibodies anti-mouse IgG HRP (NA931V; GE Healthcare), anti-goat IgG HRP (2020; Santa Cruz), and anti-rabbit IgG HRP (1238850; Boehringer Mannheim) were diluted at 1:10,000 in PBS with 0.1% Tween 20, 5% (mass/mass) milk, and used for 30 min to 3 h incubations at room temperature. Blots were visualized with ECL substrate or SuperSignal West Dura ECL substrate (Thermo Scientific). Where applicable, blots were quantified by using the ImageJ software suite (3).

1. Bornkamm GW, et al. (2005) Stringent doxycycline-dependent control of gene activities using an episomal one-vector system. *Nucleic Acids Res* 33(16):e137.
2. Meister G, et al. (2004) Human Argonaute2 mediates RNA cleavage targeted by miRNAs and siRNAs. *Mol Cell* 15(2):185–197.

3. Abramoff M, Magalhaes P, Ram S (2004) Image Processing with ImageJ. *Biophotonics Int* 11(7):36–42.

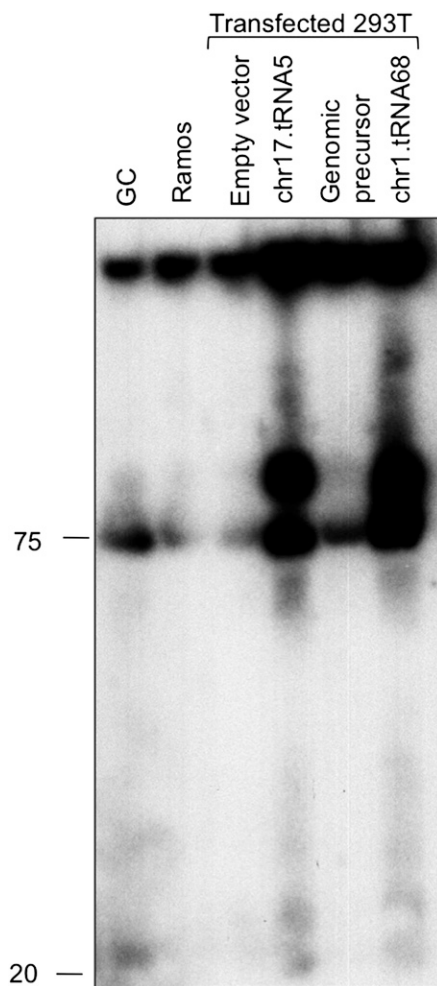

**Fig. S1.** CU1276 is expressed from two independent tRNA loci. Northern blot of total RNA from purified germinal center (GC) B cells, the Burkitt's lymphoma cell line Ramos, and 293T cells transiently transfected with empty vector, a vector encoding for Gly(GCC) chr17.tRNA5, a vector encoding for a predicted genomic precursor for CU1276, or a vector encoding for Gly(GCC) chr1.tRNA68. Both tRNA-encoding vectors were sufficient to express an ~22-nt band that comigrates with endogenous GC-expressed CU1276.

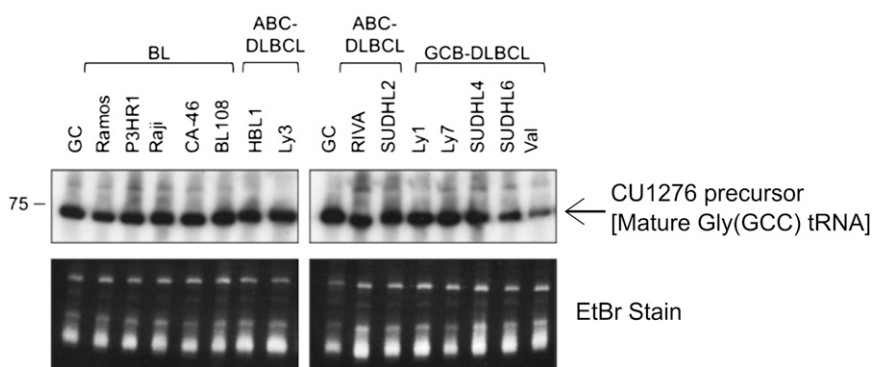

**Fig. S2.** Normal GC B cells and B-cell lymphoma lines express similar levels of Gly(GCC) tRNA. Northern blot analysis of total RNA from purified GC B cells, and from a panel of GC-derived lymphoma cell lines, including Burkitt's lymphoma (BL), activated B cell-like diffuse large B cell lymphoma (ABC-DLBCL), and GC-like diffuse large B cell lymphoma (GCB-DLBCL) subtypes. Membranes were blotted with a radioactive probe complementary to the 3' end of mature Gly(GCC) tRNA. Ethidium bromide staining was used as loading control. The majority of cell lines express levels of tRNA similar to those observed in GC B cells, suggesting that any deficiency in CU1276 expression is likely due to mechanisms acting downstream of transcriptional regulation.



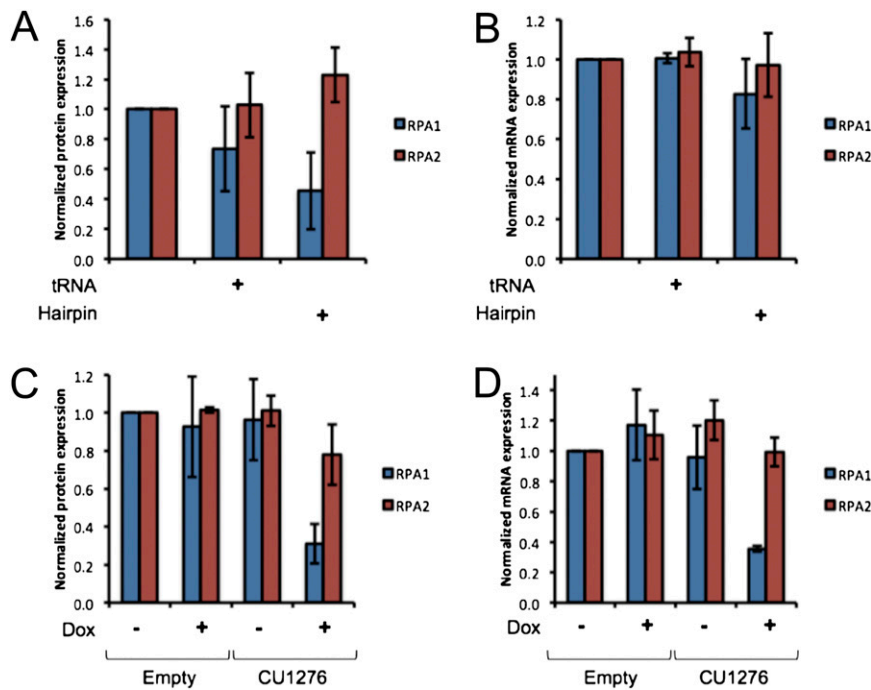

**Fig. S4.** Western Blot quantifications and qRT-PCR of *RPA1* upon CU1276 expression. (A) Western Blot quantification of RPA1 and RPA2 from 293T cells transiently transfected with either Gly(GCC) tRNA-expressing (tRNA), or CU1276 hairpin-expressing (Hairpin) vector; values are normalized to ACTB expression; error bars are the SD of four independent experiments. (B) qRT-PCR of *RPA1* and *RPA2* mRNA levels in 293T cells transiently transfected with tRNA- or Hairpin-expressing vector; values are normalized to *GAPDH* expression; error bars are the SD of three independent experiments. *RPA1* is not significantly repressed at the mRNA level in this cellular context. (C) Western Blot quantification of RPA1 and RPA2 from stable P3HR1 cells that express either GFP alone (Empty) or GFP plus CU1276 hairpin (CU1276) upon doxycycline (Dox) treatment; values are normalized to ACTB expression; error bars are the SD of four independent experiments. (D) qRT-PCR of *RPA1* and *RPA2* mRNA levels in stable P3HR1 cells that express either GFP alone (Empty) or GFP plus CU1276 hairpin (CU1276) upon doxycycline (Dox) treatment; values are normalized to *GAPDH* expression; error bars are the SD of four independent experiments. *RPA1* mRNA is significantly repressed by CU1276 expression ( $P = 1.3e-3$ ).

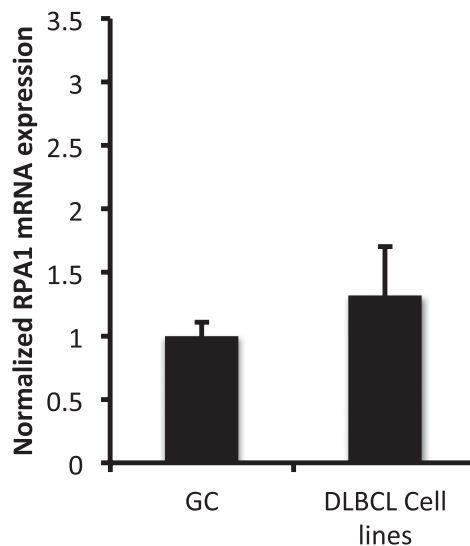

**Fig. S5.** GC cells and diffuse large B cell lymphoma (DLBCL) cell lines express similar levels of RPA1 mRNA. Normalized RPA1 mRNA expression in Germinal Center cells ( $n = 5$ ) and a panel of DLBCL cell lines ( $n = 8$ ; HBL1, Ly3, SUDHL2, RIVA, Ly7, SUDHL4, SUDHL6, and Val). Expression values were measured by Affymetrix HG-U133p2 GeneChip expression arrays. There is no significant difference between the two sample groups.
